# Supplementary material
Source: MDPI journal article supplement (https://www.mdpi.com/2078-2489/11/4/187)
Supplement: s1 [file s1]

**Supplementary Materials:** List of research studies used for the meta-analysis.

1. Anjaria, M.; Guddeti, R.M.R. Influence factor based opinion mining of Twitter data using supervised learning. In Proceedings of the Sixth International Conference on Communication Systems and Networks (COMSNETS), Bangalore, India, 6–10 June 2014.
2. Banaszak, S.; Bowman, E.; Dickerson, J.P.; Subrahmanian, V. Forecasting Country Stability in North Africa. In Proceedings of the 2014 IEEE Joint Intelligence and Security Informatics Conference, Hague, The Netherlands, 24–26 September 2014.
3. Barclay, F.P.; Pichandy, C.; Venkat, A.; Sudhakaran, S. India 2014: Facebook ‘like’ as a predictor of election outcomes. *Asian J. Political Sci.* **2015**, *23*, 134–160, doi:10.1080/02185377.2015.1020319.
4. Bastos, M.; Mercea, D. Parametrizing Brexit: Mapping Twitter political space to parliamentary constituencies. *Inf. Commun. Soc.* **2018**, *21*, 921–939, doi:10.1080/1369118X.2018.1433224.
5. Beauchamp, N. Predicting and Interpolating State-Level Polls Using Twitter Textual Data. *Am. J. Political Sci.* **2017**, *61*, 490–503, doi:10.1111/ajps.12274.
6. Bermingham, A.; Smeaton, A.F. On using Twitter to monitor political sentiment and predict election results. In Proceedings of the Workshop on Sentiment Analysis where AI meets Psychology, Chiang Mai, Thailand, 13 November 2011.
7. Borondo, J.; Morales, A.; Losada, J.C.; Benito, R.M. Characterizing and modeling an electoral campaign in the context of Twitter: 2011 Spanish Presidential election as a case study. *Chaos: Interdiscip. J. Nonlinear Sci.* **2012**, *22*, 023138, doi:10.1063/1.4729139.
8. Caldarelli, G.; Chessa, A.; Pammolli, F.; Pompa, G.; Puliga, M.; Riccaboni, M.; Riotta, G. A multi-level geographical study of Italian political elections from Twitter data. *PLoS ONE* **2014**, *9*, e95809, doi:10.1371/journal.pone.0095809.
9. Cameron, M.P.; Barrett, P.; Stewardson, B. Can social media predict election results? evidence from New Zealand. *J. Political Mark.* **2016**, *15*, 416–432, doi:10.1080/15377857.2014.959690.
10. Castro, R.; Kuffó, L.; Vaca, C. Back to# 6D: Predicting Venezuelan states political election results through Twitter. In Proceedings of the 2017 Fourth International Conference on eDemocracy & eGovernment (ICEDEG), Quito, Ecuador, 19–21 April 2017.
11. Castro, R.; Vaca, C. National leaders’ Twitter speech to infer political leaning and election results in 2015 Venezuelan Parliamentary Elections. In Proceedings of the 2017 IEEE International Conference on Data Mining Workshops (ICDMW), New Orleans, LA, USA, 18–21 November 2017.
12. Ceron, A.; Curini, L.; Iacus, S. Using social media to fore-cast electoral results: A review of state-of-the-art. *Ital J Appl Stat* **2015**, *25*, 237–259.
13. Ceron, A.; Curini, L.; Iacus, S.M. Using sentiment analysis to monitor electoral campaigns: Method matters—evidence from the United States and Italy. *Soc. Sci. Comput. Rev.* **2015**, *33*, 3–20.
14. Ceron, A.; Curini, L.; Iacus, S.M.; Porro, G. Every tweet counts? How sentiment analysis of social media can improve our knowledge of citizens’ political preferences with an application to Italy and France. *New Media Soc.* **2014**, *16*, 340–358.
15. Choy, M.; Cheong, M.; Laik, M.N.; Shung, K.P. US Presidential Election 2012 Prediction using Census Corrected Twitter Model. In Proceedings of the Twenty-Fifth AAAI Conference on Artificial Intelligence, San Francisco, CA, USA, 7–11 August 2011.
16. Choy, M.; Cheong, M.L.; Laik, M.N.; Shung, K.P. A sentiment analysis of Singapore Presidential Election 2011 using Twitter data with census correction. arXiv preprint arXiv 2011:1108.5520.
17. Chung, J.E.; Mustafaraj, E. Can collective sentiment expressed on twitter predict political elections? In Proceedings of the 25th AAAI Conference on Artificial Intelligence, San Francisco, CA, USA, 7–11 August 2011.
18. DiGrazia, J.; McKelvey, K.; Bollen, J.; Rojas, F. More tweets, more votes: Social media as a quantitative indicator of political behavior. *PLoS ONE* **2013**, *8*, e79449.
19. Dokoochaki, N.; Zikou, F.; Gillblad, D.; Matskin, M. Predicting swedish elections with twitter: A case for stochastic link structure analysis. In Proceedings of the 2015 IEEE/ACM International Conference on Advances in Social Networks Analysis and Mining, Paris, France, 26–28 August 2015.

20. Dwi Prasetyo, N.; Hauff, C. Twitter-based election prediction in the developing world. In Proceedings of the 26th ACM Conference on Hypertext & Social Media, Guzelyurt, Cyprus, 1–4 September 2015.
21. Fink, C.; Bos, N.; Perrone, A.; Liu, E.; Kopecky, J. Twitter, Public Opinion, and the 2011 Nigerian Presidential Election. In Proceedings of the 15th International Conference on Social Computing (SocialCom), Washington, DC, USA, 8–14 September 2013.
22. Franch, F. (Wisdom of the Crowds): 2010 UK election prediction with social media. *J. Inf. Technol. Politics* **2013**, *10*, 57–71.
23. Gaurav, M.; Srivastava, A.; Kumar, A.; Miller, S. Leveraging candidate popularity on Twitter to predict election outcome. In Proceedings of the 7th Workshop on Social Network Mining and Analysis, Chicago, IL, USA, 22–27 August 2013.
24. Gayo-Avello, D. Don't turn social media into another 'Literary Digest' poll. *Commun. ACM* **2011**, *54*, 121–128, doi:10.1145/2001269.2001297.
25. Gayo-Avello, D.; Metaxas, P.T.; Mustafaraj, E. Limits of electoral predictions using twitter. In Proceedings of the Fifth International AAAI Conference on Weblogs and Social Media, Barcelona, Spain, 17–21 July 2011.
26. Giglietto, F. If likes were votes: An empirical study on the 2011 Italian administrative elections. In Proceedings of the 6th International Conference on Weblogs and Social Media, Dublin, Ireland, 4–7 June 2012.
27. González-Bailón, S.; Banchs, R.E.; Kaltenbrunner, A. Emotions, public opinion, and US presidential approval rates: A 5-year analysis of online political discussions. *Hum. Commun. Res.* **2012**, *38*, 121–143.
28. He, Y.; Saif, H.; Wei, Z.; Wong, K.-F. Quantising opinions for political tweets analysis. In Proceedings of the Eighth International Conference on Language Resources and Evaluation, Istanbul, Turkey, 21–27 May 2012.
29. Hernandez-Suarez, A.; Sanchez-Perez, G.; Martinez-Hernandez, V.; Perez-Meana, H.; Toscano-Medina, K.; Nakano, M.; Sanchez, V. Predicting political mood tendencies based on Twitter data. In Proceedings of the 2017 5th International Workshop on Biometrics and Forensics (IWBF), Warwick, UK, 4–5 April 2017.
30. Huang, J.-Y. Web mining for the mayoral election prediction in Taiwan. *Aslib J. Inf. Manag.* **2017**, *69*, 688–701, doi:10.1108/AJIM-02-2017-0035.
31. Huberty, M. Can we vote with our tweet? On the perennial difficulty of election forecasting with social media. *Int. J. Forecast.* **2015**, *31*, 992–1007.
32. Huberty, M.E. Multi-cycle forecasting of congressional elections with social media. In Proceedings of the 2nd workshop on Politics, elections and data. San Francisco, CA, USA, 28 October 2013.
33. Ibrahim, M.; Abdillah, O.; Wicaksono, A.F.; Adriani, M. Buzzer Detection and Sentiment Analysis for Predicting Presidential Election Results in a Twitter Nation. In Proceedings of the Data Mining Workshop (ICDMW), 2015 IEEE International Conference, Atlantic City, NJ, USA, 14–17 November 2015.
34. Jahanbakhsh, K.; Moon, Y. The Predictive Power of Social Media: On the Predictability of US Presidential Elections using Twitter. *arXiv* **2014**, arXiv 2014:1407.0622.
35. Jaidka, K.; Ahmed, S.; Skoric, M.; Hilbert, M. Predicting elections from social media: A three-country, three-method comparative study. *Asian J. Commun.* **2019**, *29*, 252–273.
36. Jain, V.K.; Kumar, S. Towards prediction of election outcomes using social media. *Int. J. Intell. Syst. Appl.* **2017**, *9*, 20–28.
37. Jensen, M.J.; Anstead, N. Psephological investigations: Tweets, votes, and unknown unknowns in the republican nomination process. *Policy Internet* **2013**, *5*, 161–182.
38. Jose, R.; Choorailil, V.S. Prediction of election result by enhanced sentiment analysis on twitter data using classifier ensemble approach. In Proceedings of the 2016 International Conference on Data Mining and Advanced Computing (SAPIENCE), Ernakulam, India, 16–18 March 2016.
39. Jungherr, A.; Jürgens, P.; Schoen, H. Why the Pirate party won the German election of 2009 or the trouble with predictions: A response to Tumasjan, A., Sprenger, T.O., Sander, P.G., & Welpe, I.M. "Predicting elections with Twitter: What 140 characters reveal about political sentiment". *Soc. Sci. Comput. Rev.* **2012**, *30*, 229–234.
40. Kagan, V.; Stevens, A.; Subrahmanian, V. Using twitter sentiment to forecast the 2013 pakistani election and the 2014 indian election. *IEEE Intell. Syst.* **2015**, *30*, 2–5.
41. Kalampokis, E.; Karamanou, A.; Tambouris, E.; Tarabanis, K.A. On Predicting Election Results using Twitter and Linked Open Data: The Case of the UK 2010 Election. *J. UCS* **2017**, *23*, 280–303.

42. Khatua, A.; Khatua, A. Leave or remain? Deciphering Brexit deliberations on Twitter. In Proceedings of the 2016 IEEE 16th international conference on data mining workshops (ICDMW), Barcelona, Spain, 12–15 December, 2016.
43. Khatua, A.; Khatua, A.; Ghosh, K.; Chaki, N. Can# Twitter\_Trends Predict Election Results? Evidence from 2014 Indian General Election. In Proceedings of the System Sciences (HICSS), 2015 48th Hawaii International Conference on System Sciences, HI, USA, 5–8 January 2015.
44. Kim, S.-M.; Hovy, E.H. Crystal: Analyzing Predictive Opinions on the Web. In Proceedings of the 2007 EMNLP-CoNLL, Prague, Czech Republic, 28–30 June 2007.
45. Lampos, V. On voting intentions inference from Twitter content: A case study on UK 2010 General Election. *arXiv* **2012**, arXiv 2012.1204.0423.
46. Lampos, V.; Preoțiuc-Pietro, D.; Cohn, T. A user-centric model of voting intention from Social Media. In Proceedings of the 51st Annual Meeting of the Association for Computational Linguistics, Sofia, Bulgaria, 4–9 August 2013.
47. Li, H.L.; Ng, V.T.; Shiu, S.C. Predicting short interval tracking polls with online social media. In Proceedings of the 17th International Conference on Computer Supported Cooperative Work in Design (CSCWD), Whistler, BC, Canada, 27–29 June, 2013.
48. Livne, A.; Simmons, M.P.; Adar, E.; Adamic, L.A. The party is over here: Structure and content in the 2010 election. *Proc. Fifth Int. AAAI Conf. Weblogs Soc. Media* **2011**, *11*, 17–21.
49. MacWilliams, M.C. Forecasting congressional elections using facebook data. *PS: Political Sci. Politics* **2015**, *48*, 579–583.
50. Marchetti-Bowick, M.; Chambers, N. Learning for microblogs with distant supervision: Political forecasting with twitter. In Proceedings of the 13th Conference of the European Chapter of the Association for Computational Linguistics, Avignon, France, 23–27 April 2012.
51. McKelvey, K.; DiGrazia, J.; Rojas, F. Twitter publics: How online political communities signaled electoral outcomes in the 2010 US house election. *Inf. Commun. Soc.* **2014**, *17*, 436–450.
52. Mejova, Y.; Srinivasan, P.; Boynton, B. GOP primary season on twitter: Popular political sentiment in social media. In Proceedings of the sixth ACM International Conference on Web Search and Data Mining, Rome, Italy, 4–8 February 2013, pp. 517–526.
53. Metaxas, P.T.; Mustafaraj, E.; Gayo-Avello, D. How (not) to predict elections. In Proceedings of the 2011 IEEE Third International Conference on Social Computing (SocialCom), Boston, MA, USA, 5–8 January 2011.
54. Montesinos, L.; Rodríguez, S.J.P.; Orchard, M.; Eyheramendy, S. Sentiment analysis and prediction of events in TWITTER. In Proceedings of the 2015 CHILEAN Conference on Electrical, Electronics Engineering, Information and Communication Technologies (CHILECON), Santiago, Chile, 28–30 October 2015.
55. Monti, C.; Zignani, M.; Rozza, A.; Arvidsson, A.; Zappella, G.; Colleoni, E. Modelling political disaffection from twitter data. In Proceedings of the 2nd International Workshop on Issues of Sentiment Discovery and Opinion Mining, Chicago, IL, USA, 11 August 2013.
56. O'Connor, B.; Balasubramanyan, R.; Routledge, B.R.; Smith, N.A. From tweets to polls: Linking text sentiment to public opinion time series. *Proc. Fourth Int. AAAI Conf. Weblogs Soc. Media* **2010**, *11*, 122–129.
57. Oliveira, D.J.S.; Bermejo, P.H. d. S.; dos Santos, P.A. Can social media reveal the preferences of voters? A comparison between sentiment analysis and traditional opinion polls. *J. Inf. Technol. Politics* **2017**, *14*, 34–45.
58. Pimenta, F.; Obradovic, D.; Dengel, A. A comparative study of social media prediction potential in the 2012 US republican presidential preelections. In Proceedings of the 3rd International Conference on Cloud and Green Computing, Karlsruhe, Germany, 30 September–2 October 2013.
59. Razzaq, M.A.; Qamar, A.M.; Bilal, H.S.M. Prediction and analysis of Pakistan election 2013 based on sentiment analysis. In Proceedings of the 2014 IEEE/ACM International Conference on Advances in Social Networks Analysis and Mining (ASONAM), Beijing, China, 17–20 August 2014.
60. Saez-Trumper, D.; Meira, W.; Almeida, V. From total hits to unique visitors model for election forecasting. In Proceedings of the 2011 International Conference on Web Science, Koblenz, Germany, 14–17 June 2011.
61. Safiullah, M.; Pathak, P.; Singh, S.; Anshul, A. Social media as an upcoming tool for political marketing effectiveness. *Asia Pac. Manag. Rev.* **2017**, *22*, 10–15.
62. Sanders, E.; van den Bosch, A. Relating political party mentions on Twitter with polls and election results. In Proceedings of the 13th Dutch-Belgian Workshop on Information Retrieval, Delft, The Netherlands, 26 April 2013.

63. Sang, E.T.K.; Bos, J. Predicting the 2011 Dutch Senate Election Results with Twitter. In Proceedings of the Workshop on Semantic Analysis in Social Media, Avignon, France, 23–27 April 2012.
64. Sharma, P.; Moh, T.-S. Prediction of Indian election using sentiment analysis on Hindi Twitter. In Proceedings of the 2016 IEEE International Conference on Big Data (Big Data), Washington, DC, USA, 5–8 December 2016.
65. Shi, L.; Agarwal, N.; Agrawal, A.; Garg, R.; Spoelstra, J. Predicting US primary elections with Twitter. In Proceedings of the NIPS 2012 Workshop: Social Network and Social Media Analysis: Methods, Models and Applications, Lake Tahoe, Nevada, 7 December 2012. Available online: <http://snap.stanford.edu/social2012/papers/shi.pdf> (accessed on 2 March 2018)
66. Skoric, M.; Poor, N.; Achananuparp, P.; Lim, E.-P.; Jiang, J. Tweets and votes: A study of the 2011 Singapore general election. In Proceedings of the 45th Hawaii International Conference on System Science (HICSS), Maui, HI, USA, 4–7 January 2012.
67. Thapen, N.A.; Ghanem, M.M. Towards Passive Political Opinion Polling using Twitter. In Proceedings of the 2013 SMA@ BCS-SGAI, Cambridge, UK, 10 December 2013.
68. Tumasjan, A.; Sprenger, T.O.; Sandner, P.G.; Welpe, I.M. Predicting elections with Twitter: What 140 characters reveal about political sentiment. *Proc. Fourth Int. AAAI Conf. Weblogs Soc. Media* **2010**, *10*, 178–185.
69. Tumasjan, A.; Sprenger, T.O.; Sandner, P.G.; Welpe, I.M. Election forecasts with Twitter: How 140 characters reflect the political landscape. *Soc. Sci. Comput. Rev.* **2011**, *29*, 402–418.
70. Vepsäläinen, T.; Li, H.; Suomi, R. Facebook likes and public opinion: Predicting the 2015 Finnish parliamentary elections. *Gov. Inf. Q.* **2017**, *34*, 524–532.
71. Wang, L.; Gan, J.Q. Prediction of the 2017 French Election Based on Twitter Data Analysis. In 2017 9th Computer Science and Electronic Engineering. Colchester, UK, 27–29 Sep 2017.
72. Wang, M.-H.; Lei, C.-L. Boosting election prediction accuracy by crowd wisdom on social forums. In Proceedings of the Consumer Communications & Networking Conference (CCNC), 2016 13th IEEE Annual Conference, Las Vegas, NV, USA, 9–12 January 2016.
73. White, K. Forecasting Canadian Elections Using Twitter. In Proceedings of the Canadian Conference on Artificial Intelligence. Victoria, BC, Canada, 31 May–3 June 2016.
74. Xie, Z.; Liu, G.; Wu, J.; Wang, L.; Liu, C. Wisdom of fusion: Prediction of 2016 Taiwan election with heterogeneous big data. In Proceedings of the 2016 13th International Conference on Service Systems and Service Management (ICSSSM), Kunming, China, 24–26 June 2016.
